# Supplementary material
Source: publisher figshare collection journal article supplement (https://frontiersin.figshare.com/ndownloader/files/22927034)

SUPPLEMENTARY FIGURE 1

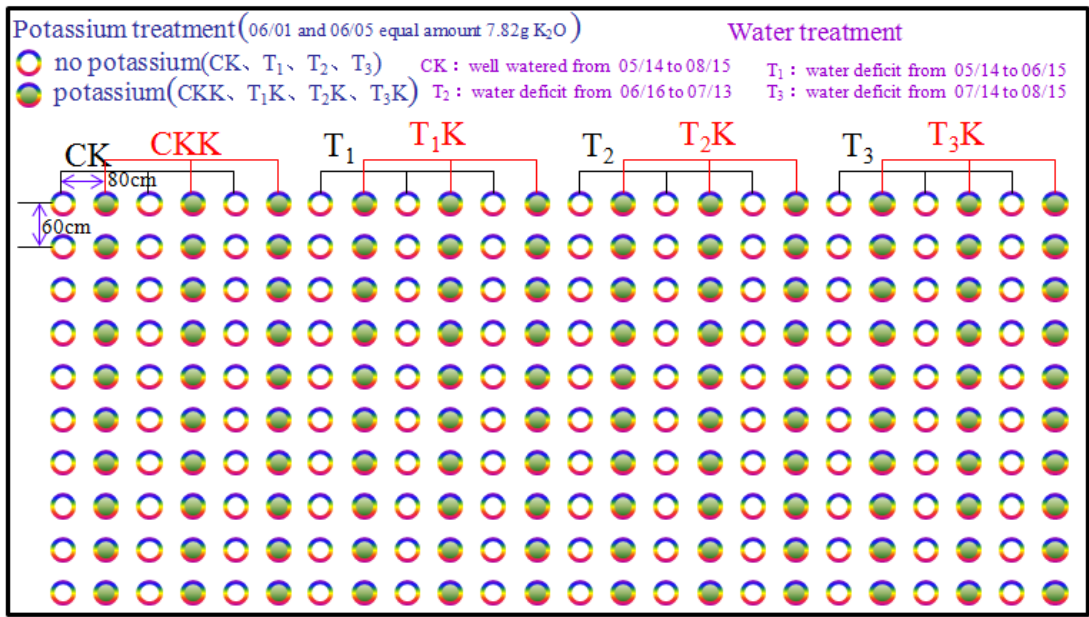

Supplement: Supplementary file [file 22927034]
